# Supplementary material for: Targeting legume loci: A comparison of three methods for target enrichment bait design in Leguminosae phylogenomics
Source: PubMed Central journal article supplement (PMC5895186; doi:10.1002/aps3.1036), 2018-04-02

Appendix S7. Number of paralogs per gene.

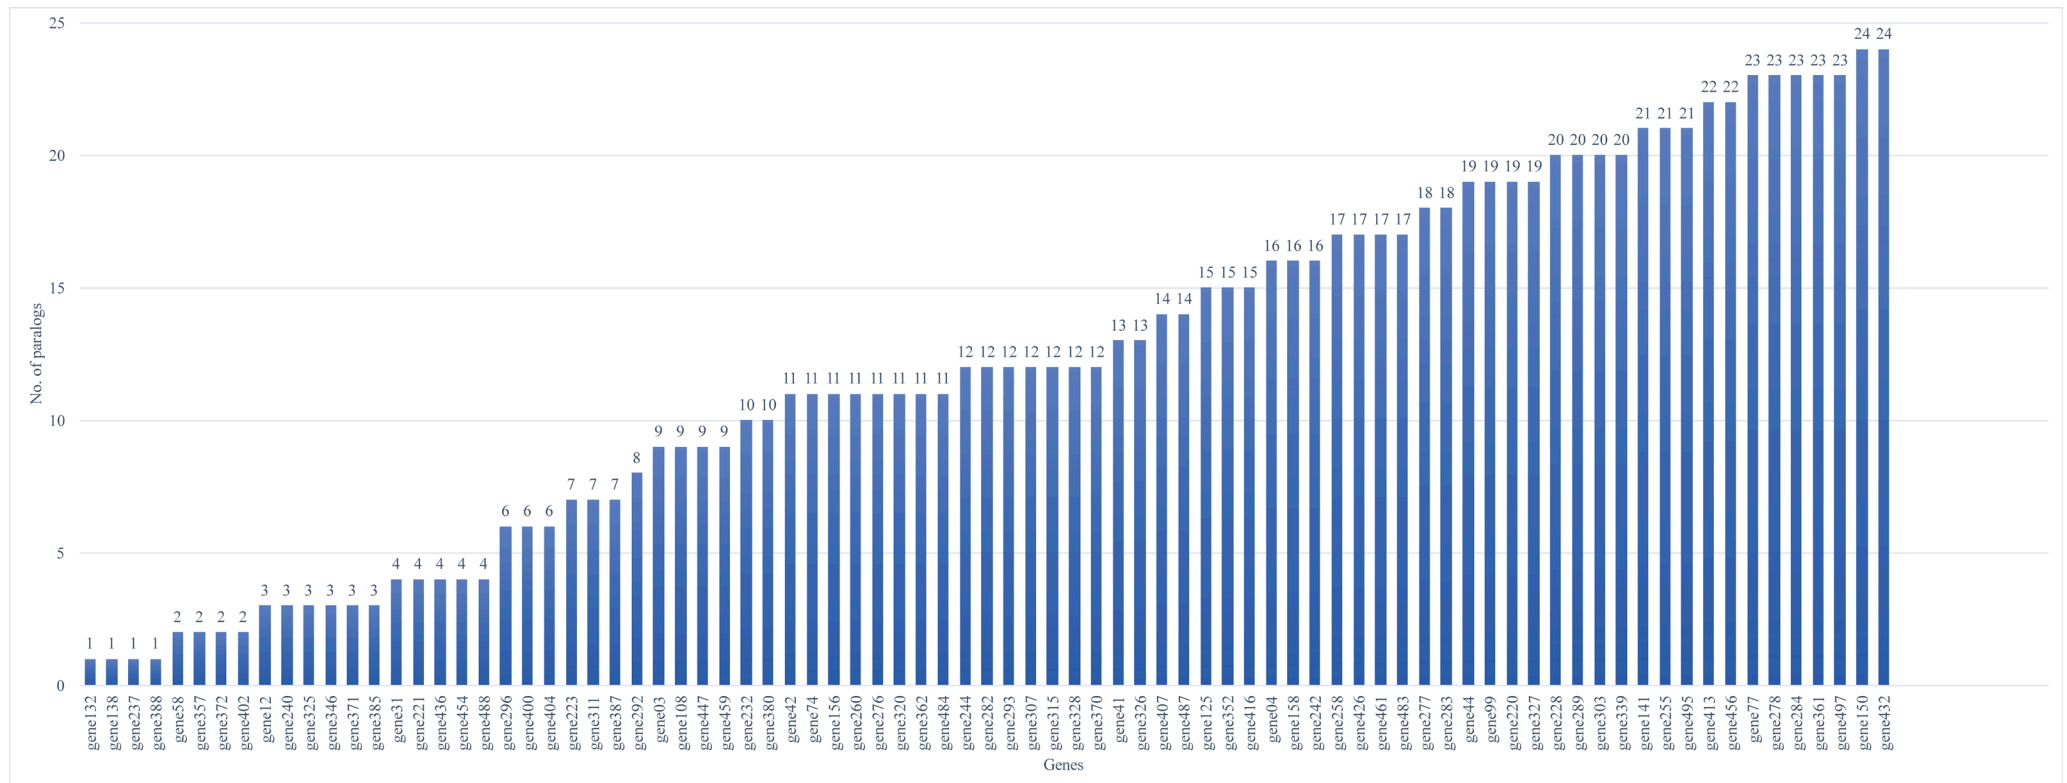

Supplement: APS3-6-e1036-s007.pdf [file APS3-6-e1036-s007.pdf]
